# Supplementary material
Source: PubMed Central journal article supplement (PMC6219923)
Supplement: NIHMS1505386-supplement-125_2018_4720_MOESM1_ESM.pdf [file NIHMS1505386-supplement-125_2018_4720_MOESM1_ESM.pdf]

## **Electronic Supplementary Material (ESM)**

- 1. ESM Table 1. Associations between Body Fat Parameters and Ceramides**
- 2. ESM Table 2. Subgroup Analyses for Associations between Body Fat Parameters and Ceramides**
- 3. ESM Table 3. Associations between Ceramides and Non-Alcoholic Fatty Liver Disease (NAFLD)**
- 4. ESM Table 4. Associations between Body Fat Parameters and Ceramide Ratios**
- 5. ESM Table 5. Associations of Ceramides with Incident HOMA-IR (>3) at Follow-Up**
- 6. ESM Fig. 1. Adjusted Correlations between Ceramide Species in the Dallas Heart Study**
- 7. ESM Fig. 2. Adjusted Correlations between Ceramide and Free Fatty Acid Species in the Dallas Heart Study**

**ESM Table 1. Associations between Body Fat Parameters and Ceramides**

\*Model adjusted for age, sex, race/ethnicity

†Model adjusted for age, sex, race/ethnicity, and body mass index

‡Model adjusted for age, sex, race/ethnicity, body mass index, and visceral fat

| <b>Ceramide</b> | <b>Fat Parameter</b> | <b>Beta (95% CI)</b> | <b>P-value*</b>       |
|-----------------|----------------------|----------------------|-----------------------|
| C16:0           | Body Mass Index      | 0.09 (0.03, 0.14)    | 0.0011                |
| C18:0           | Body Mass Index      | 0.19 (0.14, 0.24)    | 2.8×10 <sup>-13</sup> |
| C20:0           | Body Mass Index      | 0.08 (0.02, 0.13)    | 0.0039                |
| C22:1           | Body Mass Index      | 0.05 (0.00, 0.10)    | 0.0417                |
| C22:9           | Body Mass Index      | 0.07 (0.02, 0.12)    | 0.0063                |
| C22:10          | Body Mass Index      | 0.23 (0.19, 0.28)    | 1.0×10 <sup>-21</sup> |
| C24:2           | Body Mass Index      | 0.01 (-0.04, 0.07)   | 0.6168                |
| C24:10          | Body Mass Index      | 0.08 (0.02, 0.13)    | 0.0036                |
| C26:9           | Body Mass Index      | -0.04 (-0.08, 0.01)  | 0.1630                |
| C28:9           | Body Mass Index      | 0.09 (0.05, 0.14)    | 1.4×10 <sup>-04</sup> |
| C30:9           | Body Mass Index      | 0.06 (0.01, 0.11)    | 0.0146                |
| C30:10          | Body Mass Index      | 0.09 (0.04, 0.13)    | 6.1×10 <sup>-04</sup> |
| C32:11          | Body Mass Index      | 0.07 (0.03, 0.12)    | 0.0031                |

| <b>Ceramide</b> | <b>Fat Parameter</b> | <b>Beta (95% CI)</b> | <b>P-value*</b>       | <b>Beta (95% CI)</b> | <b>P-value†</b>       |
|-----------------|----------------------|----------------------|-----------------------|----------------------|-----------------------|
| C16:0           | Total Abdominal Fat  | 0.11 (0.06, 0.16)    | 3.1×10 <sup>-05</sup> | 0.20 (0.07, 0.34)    | 0.0026                |
| C18:0           | Total Abdominal Fat  | 0.21 (0.16, 0.26)    | 4.0×10 <sup>-16</sup> | 0.24 (0.11, 0.37)    | 2.9×10 <sup>-04</sup> |
| C20:0           | Total Abdominal Fat  | 0.10 (0.05, 0.15)    | 1.2×10 <sup>-04</sup> | 0.20 (0.07, 0.34)    | 0.0023                |
| C22:1           | Total Abdominal Fat  | 0.08 (0.02, 0.13)    | 0.0037                | 0.18 (0.05, 0.31)    | 0.0074                |
| C22:9           | Total Abdominal Fat  | 0.08 (0.03, 0.13)    | 0.0018                | 0.10 (-0.03, 0.24)   | 0.1178                |
| C22:10          | Total Abdominal Fat  | 0.25 (0.21, 0.30)    | 3.8×10 <sup>-26</sup> | 0.28 (0.16, 0.40)    | 6.5×10 <sup>-06</sup> |
| C24:2           | Total Abdominal Fat  | 0.04 (-0.01, 0.10)   | 0.0955                | 0.22 (0.08, 0.35)    | 0.0016                |
| C24:10          | Total Abdominal Fat  | 0.08 (0.03, 0.13)    | 0.0010                | 0.11 (-0.02, 0.24)   | 0.1080                |
| C26:9           | Total Abdominal Fat  | -0.03 (-0.08, 0.02)  | 0.2627                | 0.03 (-0.1, 0.16)    | 0.6580                |
| C28:9           | Total Abdominal Fat  | 0.11 (0.06, 0.16)    | 9.0×10 <sup>-06</sup> | 0.16 (0.03, 0.28)    | 0.0152                |
| C30:9           | Total Abdominal Fat  | 0.08 (0.03, 0.13)    | 0.0011                | 0.18 (0.05, 0.31)    | 0.0076                |
| C30:10          | Total Abdominal Fat  | 0.10 (0.05, 0.15)    | 5.1×10 <sup>-05</sup> | 0.15 (0.02, 0.28)    | 0.0207                |
| C32:11          | Total Abdominal Fat  | 0.10 (0.05, 0.15)    | 1.0×10 <sup>-04</sup> | 0.20 (0.07, 0.32)    | 0.0026                |

| <b>Ceramide</b> | <b>Fat Parameter</b>   | <b>Beta (95% CI)</b> | <b>P-value*</b>       | <b>Beta (95% CI)</b> | <b>P-value†</b>       |
|-----------------|------------------------|----------------------|-----------------------|----------------------|-----------------------|
| C16:0           | Visceral Fat/Total Fat | 0.12 (0.03, 0.20)    | 0.0091                | 0.16 (0.07, 0.25)    | 3.6×10 <sup>-04</sup> |
| C18:0           | Visceral Fat/Total Fat | 0.10 (0.01, 0.18)    | 0.0306                | 0.18 (0.09, 0.27)    | 4.3×10 <sup>-05</sup> |
| C20:0           | Visceral Fat/Total Fat | 0.10 (0.02, 0.19)    | 0.0188                | 0.15 (0.06, 0.24)    | 0.0011                |
| C22:1           | Visceral Fat/Total Fat | 0.05 (-0.04, 0.14)   | 0.2678                | 0.08 (-0.01, 0.17)   | 0.0842                |
| C22:9           | Visceral Fat/Total Fat | -0.08 (-0.16, 0.01)  | 0.0819                | -0.05 (-0.14, 0.04)  | 0.2546                |
| C22:10          | Visceral Fat/Total Fat | -0.14 (-0.22, -0.06) | 5.9×10 <sup>-04</sup> | -0.05 (-0.13, 0.03)  | 0.2062                |
| C24:2           | Visceral Fat/Total Fat | 0.10 (0.01, 0.19)    | 0.0327                | 0.12 (0.02, 0.21)    | 0.0134                |
| C24:10          | Visceral Fat/Total Fat | -0.08 (-0.16, 0.01)  | 0.0715                | -0.05 (-0.14, 0.04)  | 0.2514                |
| C26:9           | Visceral Fat/Total Fat | -0.11 (-0.20, -0.03) | 0.0080                | -0.13 (-0.22, -0.05) | 0.0028                |
| C28:9           | Visceral Fat/Total Fat | -0.06 (-0.14, 0.02)  | 0.1475                | -0.02 (-0.11, 0.07)  | 0.6459                |
| C30:9           | Visceral Fat/Total Fat | -0.05 (-0.13, 0.04)  | 0.2726                | -0.02 (-0.11, 0.07)  | 0.6539                |
| C30:10          | Visceral Fat/Total Fat | -0.17 (-0.25, -0.09) | 4.8×10 <sup>-05</sup> | -0.14 (-0.23, -0.06) | 8.8×10 <sup>-04</sup> |
| C32:11          | Visceral Fat/Total Fat | -0.18 (-0.27, -0.10) | 1.5×10 <sup>-05</sup> | -0.16 (-0.25, -0.08) | 1.7×10 <sup>-04</sup> |

| <b>Ceramide</b> | <b>Fat Parameter</b>       | <b>Beta (95% CI)</b> | <b>P-value*</b>       | <b>Beta (95% CI)</b> | <b>P-value†</b> |
|-----------------|----------------------------|----------------------|-----------------------|----------------------|-----------------|
| C16:0           | Subcutaneous Fat/Total Fat | 0.12 (0.07, 0.17)    | 8.6×10 <sup>-06</sup> | 0.09 (0.04, 0.15)    | 0.0013          |
| C18:0           | Subcutaneous Fat/Total Fat | 0.14 (0.09, 0.19)    | 1.1×10 <sup>-07</sup> | 0.07 (0.02, 0.13)    | 0.0103          |
| C20:0           | Subcutaneous Fat/Total Fat | 0.11 (0.06, 0.16)    | 3.2×10 <sup>-05</sup> | 0.08 (0.03, 0.14)    | 0.0032          |
| C22:1           | Subcutaneous Fat/Total Fat | 0.10 (0.04, 0.15)    | 2.9×10 <sup>-04</sup> | 0.08 (0.03, 0.14)    | 0.0042          |
| C22:9           | Subcutaneous Fat/Total Fat | 0.05 (0.00, 0.10)    | 0.0763                | 0.02 (-0.04, 0.08)   | 0.4738          |
| C22:10          | Subcutaneous Fat/Total Fat | 0.12 (0.08, 0.17)    | 3.9×10 <sup>-07</sup> | 0.03 (-0.02, 0.08)   | 0.2161          |
| C24:2           | Subcutaneous Fat/Total Fat | 0.07 (0.02, 0.12)    | 0.0109                | 0.07 (0.01, 0.12)    | 0.0249          |
| C24:10          | Subcutaneous Fat/Total Fat | 0.05 (0.00, 0.10)    | 0.0694                | 0.02 (-0.04, 0.07)   | 0.5114          |
| C26:9           | Subcutaneous Fat/Total Fat | 0.00 (-0.05, 0.05)   | 0.8548                | 0.01 (-0.05, 0.06)   | 0.7650          |
| C28:9           | Subcutaneous Fat/Total Fat | 0.08 (0.03, 0.13)    | 0.0010                | 0.05 (-0.01, 0.10)   | 0.0988          |
| C30:9           | Subcutaneous Fat/Total Fat | 0.08 (0.03, 0.13)    | 0.0015                | 0.06 (0.01, 0.12)    | 0.0279          |
| C30:10          | Subcutaneous Fat/Total Fat | 0.06 (0.01, 0.11)    | 0.0164                | 0.03 (-0.03, 0.08)   | 0.3102          |
| C32:11          | Subcutaneous Fat/Total Fat | 0.06 (0.01, 0.11)    | 0.0138                | 0.04 (-0.02, 0.09)   | 0.1712          |

| <b>Ceramide</b> | <b>Fat Parameter</b> | <b>Beta (95% CI)</b> | <b>P-value*</b>       | <b>Beta (95% CI)</b> | <b>P-value†</b>       |
|-----------------|----------------------|----------------------|-----------------------|----------------------|-----------------------|
| C16:0           | Lower Fat/Total Fat  | -0.15 (-0.22, -0.09) | 1.4×10 <sup>-06</sup> | -0.13 (-0.19, -0.06) | 1.2×10 <sup>-04</sup> |
| C18:0           | Lower Fat/Total Fat  | -0.24 (-0.31, -0.18) | 1.9×10 <sup>-14</sup> | -0.19 (-0.25, -0.12) | 1.3×10 <sup>-08</sup> |
| C20:0           | Lower Fat/Total Fat  | -0.16 (-0.22, -0.10) | 4.6×10 <sup>-07</sup> | -0.14 (-0.2, -0.07)  | 4.0×10 <sup>-05</sup> |
| C22:1           | Lower Fat/Total Fat  | -0.10 (-0.16, -0.04) | 0.0022                | -0.08 (-0.15, -0.01) | 0.0168                |
| C22:9           | Lower Fat/Total Fat  | 0.03 (-0.03, 0.09)   | 0.3067                | 0.07 (0.00, 0.13)    | 0.0459                |
| C22:10          | Lower Fat/Total Fat  | -0.05 (-0.11, 0.00)  | 0.0696                | 0.04 (-0.02, 0.10)   | 0.1720                |
| C24:2           | Lower Fat/Total Fat  | -0.07 (-0.14, -0.01) | 0.0255                | -0.07 (-0.14, 0.00)  | 0.0520                |
| C24:10          | Lower Fat/Total Fat  | 0.02 (-0.04, 0.08)   | 0.5026                | 0.06 (-0.01, 0.12)   | 0.0881                |
| C26:9           | Lower Fat/Total Fat  | 0.15 (0.09, 0.21)    | 1.3×10 <sup>-06</sup> | 0.15 (0.09, 0.22)    | 2.2×10 <sup>-06</sup> |
| C28:9           | Lower Fat/Total Fat  | -0.06 (-0.13, 0.00)  | 0.0344                | -0.03 (-0.09, 0.04)  | 0.4336                |
| C30:9           | Lower Fat/Total Fat  | -0.02 (-0.09, 0.04)  | 0.4323                | 0.00 (-0.06, 0.07)   | 0.8982                |
| C30:10          | Lower Fat/Total Fat  | 0.08 (0.02, 0.14)    | 0.0139                | 0.12 (0.06, 0.19)    | 1.3×10 <sup>-04</sup> |
| C32:11          | Lower Fat/Total Fat  | 0.08 (0.02, 0.14)    | 0.0071                | 0.12 (0.06, 0.19)    | 1.2×10 <sup>-04</sup> |

| <b>Ceramide</b> | <b>Fat Parameter</b> | <b>Beta (95% CI)</b> | <b>P-value*</b>       | <b>Beta (95% CI)</b> | <b>P-value<sup>†</sup></b> |
|-----------------|----------------------|----------------------|-----------------------|----------------------|----------------------------|
| C16:0           | Liver Fat            | 0.05 (-0.01, 0.11)   | 0.0976                | 0.03 (-0.04, 0.09)   | 0.4003                     |
| C18:0           | Liver Fat            | 0.15 (0.09, 0.20)    | 2.8×10 <sup>-07</sup> | 0.10 (0.04, 0.16)    | 0.0010                     |
| C20:0           | Liver Fat            | 0.07 (0.02, 0.13)    | 0.0115                | 0.05 (-0.01, 0.11)   | 0.1103                     |
| C22:1           | Liver Fat            | -0.03 (-0.08, 0.03)  | 0.3649                | -0.04 (-0.10, 0.02)  | 0.1635                     |
| C22:9           | Liver Fat            | -0.04 (-0.10, 0.01)  | 0.1267                | -0.08 (-0.14, -0.02) | 0.0108                     |
| C22:10          | Liver Fat            | 0.05 (-0.01, 0.10)   | 0.0811                | -0.04 (-0.10, 0.02)  | 0.1603                     |
| C24:2           | Liver Fat            | -0.10 (-0.15, -0.04) | 0.0010                | -0.10 (-0.17, -0.04) | 9.1×10 <sup>-04</sup>      |
| C24:10          | Liver Fat            | -0.04 (-0.10, 0.02)  | 0.1524                | -0.08 (-0.14, -0.02) | 0.0099                     |
| C26:9           | Liver Fat            | -0.14 (-0.20, -0.09) | 2.3×10 <sup>-07</sup> | -0.15 (-0.21, -0.09) | 6.4×10 <sup>-07</sup>      |
| C28:9           | Liver Fat            | 0.03 (-0.03, 0.08)   | 0.3165                | -0.01 (-0.07, 0.05)  | 0.7132                     |
| C30:9           | Liver Fat            | 0.00 (-0.06, 0.05)   | 0.9163                | -0.03 (-0.09, 0.03)  | 0.3657                     |
| C30:10          | Liver Fat            | -0.08 (-0.14, -0.03) | 0.0032                | -0.12 (-0.18, -0.06) | 4.2×10 <sup>-05</sup>      |
| C32:11          | Liver Fat            | -0.11 (-0.16, -0.05) | 1.3×10 <sup>-04</sup> | -0.15 (-0.20, -0.09) | 1.1×10 <sup>-06</sup>      |

| <b>Ceramide</b> | <b>Fat Parameter</b> | <b>Beta (95% CI)</b> | <b>P-value<sup>‡</sup></b> |
|-----------------|----------------------|----------------------|----------------------------|
| C16:0           | Liver Fat            | 0.01 (-0.05, 0.08)   | 0.6827                     |
| C18:0           | Liver Fat            | 0.08 (0.02, 0.14)    | 0.0129                     |
| C20:0           | Liver Fat            | 0.02 (-0.04, 0.09)   | 0.4442                     |
| C22:1           | Liver Fat            | -0.06 (-0.13, 0.00)  | 0.0492                     |
| C22:9           | Liver Fat            | -0.08 (-0.14, -0.02) | 0.0135                     |
| C22:10          | Liver Fat            | -0.04 (-0.10, 0.02)  | 0.2121                     |
| C24:2           | Liver Fat            | -0.13 (-0.19, -0.07) | 6.5×10 <sup>-05</sup>      |
| C24:10          | Liver Fat            | -0.08 (-0.14, -0.02) | 0.0108                     |
| C26:9           | Liver Fat            | -0.13 (-0.19, -0.07) | 1.77×10 <sup>-05</sup>     |
| C28:9           | Liver Fat            | -0.02 (-0.08, 0.04)  | 0.4795                     |
| C30:9           | Liver Fat            | -0.04 (-0.10, 0.02)  | 0.2306                     |
| C30:10          | Liver Fat            | -0.12 (-0.18, -0.06) | 1.5×10 <sup>-04</sup>      |
| C32:11          | Liver Fat            | -0.14 (-0.20, -0.08) | 1.0×10 <sup>-05</sup>      |

Beta = beta-coefficient represents the difference in s.d. units in ceramide concentration per 1-standard deviation of the body fat depot; CI= confidence limit  
P<0.0003 considered statistically significant.

**ESM Table 2. Subgroup Analyses for Associations between Body Fat Parameters and Ceramides**

| Ceramide | Fat Parameter          | Male   |                 |         | Female |                 |                        | P-interaction          |
|----------|------------------------|--------|-----------------|---------|--------|-----------------|------------------------|------------------------|
|          |                        | Beta   | 95% CI          | P-value | Beta   | 95% CI          | P-value                |                        |
| C16:0    | Visceral Fat/Total Fat | 0.177  | (0.070,0.283)   | 0.0012  | 0.122  | (-0.050,0.293)  | 0.1651                 | 0.7498                 |
| C18:0    | Visceral Fat/Total Fat | 0.170  | (0.063,0.276)   | 0.0019  | 0.266  | (0.102,0.429)   | 0.0015                 | 0.1268                 |
| C20:0    | Visceral Fat/Total Fat | 0.158  | (0.051,0.265)   | 0.0039  | 0.205  | (0.038,0.373)   | 0.0164                 | 0.1868                 |
| C22:1    | Visceral Fat/Total Fat | 0.097  | (-0.007,0.202)  | 0.0671  | 0.093  | (-0.085,0.270)  | 0.3061                 | 0.6739                 |
| C22:9    | Visceral Fat/Total Fat | 0.025  | (-0.081,0.131)  | 0.6437  | -0.247 | (-0.413,-0.080) | 0.0038                 | 0.0206                 |
| C22:10   | Visceral Fat/Total Fat | 0.029  | (-0.064,0.122)  | 0.5406  | -0.252 | (-0.412,-0.092) | 0.0020                 | 0.0288                 |
| C24:2    | Visceral Fat/Total Fat | 0.084  | (-0.027,0.195)  | 0.1404  | 0.185  | (0.008,0.361)   | 0.0408                 | 0.4881                 |
| C24:10   | Visceral Fat/Total Fat | 0.013  | (-0.094,0.119)  | 0.8159  | -0.224 | (-0.391,-0.057) | 0.0089                 | 0.0286                 |
| C26:9    | Visceral Fat/Total Fat | -0.040 | (-0.141,0.061)  | 0.4410  | -0.424 | (-0.591,-0.257) | 7.75×10 <sup>-07</sup> | 7.26×10 <sup>-05</sup> |
| C28:9    | Visceral Fat/Total Fat | 0.066  | (-0.035,0.168)  | 0.2022  | -0.156 | (-0.318,0.006)  | 0.0595                 | 0.3850                 |
| C30:9    | Visceral Fat/Total Fat | 0.038  | (-0.069,0.144)  | 0.4867  | -0.113 | (-0.281,0.056)  | 0.1897                 | 0.5078                 |
| C30:10   | Visceral Fat/Total Fat | -0.076 | (-0.177,0.025)  | 0.1421  | -0.325 | (-0.487,-0.162) | 9.52×10 <sup>-05</sup> | 0.0237                 |
| C32:11   | Visceral Fat/Total Fat | -0.115 | (-0.216,-0.014) | 0.0261  | -0.313 | (-0.476,-0.149) | 1.9×10 <sup>-04</sup>  | 0.0485                 |

  

| Ceramide | Fat Parameter          | Black  |                 |                       | Non-Black |                 |                       | P-interaction |
|----------|------------------------|--------|-----------------|-----------------------|-----------|-----------------|-----------------------|---------------|
|          |                        | Beta   | 95% CI          | P-value               | Beta      | 95% CI          | P-value               |               |
| C16:0    | Visceral Fat/Total Fat | 0.264  | (0.153,0.375)   | 3.7×10 <sup>-06</sup> | 0.042     | (-0.100,0.184)  | 0.5622                | 0.1200        |
| C18:0    | Visceral Fat/Total Fat | 0.206  | (0.093,0.318)   | 3.6×10 <sup>-04</sup> | 0.152     | (0.018,0.286)   | 0.0261                | 0.5029        |
| C20:0    | Visceral Fat/Total Fat | 0.145  | (0.030,0.259)   | 0.0135                | 0.127     | (-0.011,0.265)  | 0.0715                | 0.8483        |
| C22:1    | Visceral Fat/Total Fat | 0.112  | (-0.005,0.230)  | 0.0606                | 0.027     | (-0.112,0.166)  | 0.7066                | 0.0138        |
| C22:9    | Visceral Fat/Total Fat | -0.074 | (-0.184,0.035)  | 0.1830                | -0.054    | (-0.198,0.090)  | 0.4633                | 0.1816        |
| C22:10   | Visceral Fat/Total Fat | -0.093 | (-0.196,0.010)  | 0.0756                | -0.036    | (-0.167,0.095)  | 0.5877                | 0.3727        |
| C24:2    | Visceral Fat/Total Fat | 0.161  | (0.040,0.282)   | 0.0090                | 0.101     | (-0.042,0.244)  | 0.1681                | 0.3268        |
| C24:10   | Visceral Fat/Total Fat | -0.064 | (-0.174,0.046)  | 0.2549                | -0.065    | (-0.209,0.078)  | 0.3731                | 0.0890        |
| C26:9    | Visceral Fat/Total Fat | -0.131 | (-0.241,-0.021) | 0.0201                | -0.174    | (-0.312,-0.037) | 0.0133                | 0.1875        |
| C28:9    | Visceral Fat/Total Fat | -0.042 | (-0.153,0.069)  | 0.4563                | -0.062    | (-0.197,0.073)  | 0.3655                | 0.1328        |
| C30:9    | Visceral Fat/Total Fat | -0.04  | (-0.152,0.072)  | 0.4819                | -0.014    | (-0.155,0.128)  | 0.8485                | 0.6913        |
| C30:10   | Visceral Fat/Total Fat | -0.123 | (-0.228,-0.018) | 0.0220                | -0.19     | (-0.328,-0.052) | 0.0073                | 0.0043        |
| C32:11   | Visceral Fat/Total Fat | -0.119 | (-0.226,-0.012) | 0.0294                | -0.235    | (-0.372,-0.099) | 7.7×10 <sup>-04</sup> | 0.0145        |

| Ceramide | Fat Parameter          | Age <50 |                 |                       | Age ≥50 |                |         | P-interaction |
|----------|------------------------|---------|-----------------|-----------------------|---------|----------------|---------|---------------|
|          |                        | Beta    | 95% CI          | P-value               | Beta    | 95% CI         | P-value |               |
| C16:0    | Visceral Fat/Total Fat | 0.191   | (0.088,0.293)   | 2.7×10 <sup>-04</sup> | 0.167   | (-0.001,0.334) | 0.0520  | 0.0228        |
| C18:0    | Visceral Fat/Total Fat | 0.201   | (0.101,0.300)   | 8.3×10 <sup>-05</sup> | 0.189   | (0.023,0.356)  | 0.0266  | 0.0757        |
| C20:0    | Visceral Fat/Total Fat | 0.141   | (0.037,0.244)   | 0.0077                | 0.206   | (0.043,0.369)  | 0.0136  | 0.1046        |
| C22:1    | Visceral Fat/Total Fat | 0.053   | (-0.052,0.158)  | 0.3195                | 0.179   | (0.009,0.348)  | 0.0393  | 0.1455        |
| C22:9    | Visceral Fat/Total Fat | -0.059  | (-0.160,0.042)  | 0.2549                | 0.036   | (-0.133,0.205) | 0.6780  | 0.1585        |
| C22:10   | Visceral Fat/Total Fat | -0.037  | (-0.130,0.057)  | 0.4432                | 0.017   | (-0.140,0.174) | 0.8283  | 0.0042        |
| C24:2    | Visceral Fat/Total Fat | 0.117   | (0.010,0.224)   | 0.0329                | 0.152   | (-0.026,0.330) | 0.0949  | 0.1732        |
| C24:10   | Visceral Fat/Total Fat | -0.057  | (-0.158,0.045)  | 0.2732                | 0.033   | (-0.137,0.202) | 0.7066  | 0.0855        |
| C26:9    | Visceral Fat/Total Fat | -0.168  | (-0.268,-0.068) | 9.9×10 <sup>-04</sup> | -0.009  | (-0.173,0.156) | 0.9188  | 0.9191        |
| C28:9    | Visceral Fat/Total Fat | -0.068  | (-0.167,0.030)  | 0.1733                | 0.165   | (0.005,0.325)  | 0.0435  | 0.0862        |
| C30:9    | Visceral Fat/Total Fat | -0.042  | (-0.143,0.059)  | 0.4161                | 0.08    | (-0.092,0.252) | 0.3633  | 0.0646        |
| C30:10   | Visceral Fat/Total Fat | -0.18   | (-0.277,-0.082) | 3.2×10 <sup>-04</sup> | 0.008   | (-0.154,0.170) | 0.9247  | 0.0638        |
| C32:11   | Visceral Fat/Total Fat | -0.188  | (-0.287,-0.089) | 2.0×10 <sup>-04</sup> | -0.048  | (-0.205,0.109) | 0.5482  | 0.1066        |

| Ceramide | Fat Parameter          | Non-Obese |                 |                       | Obese  |                 |                       | P-interaction         |
|----------|------------------------|-----------|-----------------|-----------------------|--------|-----------------|-----------------------|-----------------------|
|          |                        | Beta      | 95% CI          | P-value               | Beta   | 95% CI          | P-value               |                       |
| C16:0    | Visceral Fat/Total Fat | 0.191     | (0.086,0.295)   | 3.6×10 <sup>-04</sup> | 0.126  | (-0.038,0.291)  | 0.1316                | 0.1500                |
| C18:0    | Visceral Fat/Total Fat | 0.229     | (0.127,0.331)   | 1.2×10 <sup>-05</sup> | 0.057  | (-0.105,0.219)  | 0.4923                | 0.0567                |
| C20:0    | Visceral Fat/Total Fat | 0.203     | (0.099,0.306)   | 1.3×10 <sup>-04</sup> | 0.051  | (-0.115,0.216)  | 0.5504                | 0.6410                |
| C22:1    | Visceral Fat/Total Fat | 0.121     | (0.013,0.229)   | 0.0279                | 0.004  | (-0.156,0.165)  | 0.9580                | 0.0205                |
| C22:9    | Visceral Fat/Total Fat | -0.01     | (-0.113,0.093)  | 0.8531                | -0.102 | (-0.264,0.060)  | 0.2178                | 0.1830                |
| C22:10   | Visceral Fat/Total Fat | 0.005     | (-0.092,0.101)  | 0.9220                | -0.192 | (-0.346,-0.039) | 0.0145                | 0.0037                |
| C24:2    | Visceral Fat/Total Fat | 0.169     | (0.063,0.276)   | 0.0019                | 0.000  | (-0.174,0.174)  | 0.9976                | 1.4×10 <sup>-04</sup> |
| C24:10   | Visceral Fat/Total Fat | -0.017    | (-0.120,0.086)  | 0.7493                | -0.082 | (-0.245,0.081)  | 0.3262                | 0.1785                |
| C26:9    | Visceral Fat/Total Fat | -0.083    | (-0.184,0.019)  | 0.1115                | -0.218 | (-0.373,-0.062) | 0.0062                | 0.0048                |
| C28:9    | Visceral Fat/Total Fat | 0.032     | (-0.071,0.134)  | 0.5454                | -0.095 | (-0.245,0.055)  | 0.2147                | 0.4718                |
| C30:9    | Visceral Fat/Total Fat | 0.028     | (-0.076,0.132)  | 0.5976                | -0.086 | (-0.248,0.077)  | 0.3024                | 0.4704                |
| C30:10   | Visceral Fat/Total Fat | -0.089    | (-0.191,0.014)  | 0.0897                | -0.249 | (-0.398,-0.100) | 0.0011                | 0.0014                |
| C32:11   | Visceral Fat/Total Fat | -0.104    | (-0.205,-0.003) | 0.0441                | -0.286 | (-0.438,-0.134) | 2.4×10 <sup>-04</sup> | 1.5×10 <sup>-04</sup> |

| Ceramide | Fat Parameter       | Male   |                 |                       | Female |                 |                       | P-interaction |
|----------|---------------------|--------|-----------------|-----------------------|--------|-----------------|-----------------------|---------------|
|          |                     | Beta   | 95% CI          | P-value               | Beta   | 95% CI          | P-value               |               |
| C16:0    | Lower Fat/Total Fat | -0.124 | (-0.237,-0.012) | 0.0305                | -0.129 | (-0.211,-0.048) | 0.0020                | 0.9964        |
| C18:0    | Lower Fat/Total Fat | -0.15  | (-0.262,-0.038) | 0.0091                | -0.223 | (-0.301,-0.144) | 3.3×10 <sup>-08</sup> | 0.4710        |
| C20:0    | Lower Fat/Total Fat | -0.108 | (-0.218,0.003)  | 0.0560                | -0.174 | (-0.254,-0.093) | 2.6×10 <sup>-05</sup> | 0.8401        |
| C22:1    | Lower Fat/Total Fat | -0.026 | (-0.135,0.083)  | 0.6385                | -0.115 | (-0.20,-0.030)  | 0.0080                | 0.4546        |
| C22:9    | Lower Fat/Total Fat | 0.046  | (-0.065,0.157)  | 0.4129                | 0.086  | (0.005,0.166)   | 0.0373                | 0.6160        |
| C22:10   | Lower Fat/Total Fat | 0.012  | (-0.084,0.109)  | 0.8015                | 0.066  | (-0.011,0.143)  | 0.0954                | 0.8012        |
| C24:2    | Lower Fat/Total Fat | 0.087  | (-0.028,0.202)  | 0.1406                | -0.146 | (-0.231,-0.061) | 8.2×10 <sup>-04</sup> | 0.0014        |
| C24:10   | Lower Fat/Total Fat | 0.039  | (-0.072,0.150)  | 0.4925                | 0.076  | (-0.005,0.157)  | 0.0660                | 0.5805        |
| C26:9    | Lower Fat/Total Fat | 0.165  | (0.060,0.270)   | 0.0021                | 0.158  | (0.077,0.239)   | 1.4×10 <sup>-04</sup> | 0.8928        |
| C28:9    | Lower Fat/Total Fat | -0.011 | (-0.117,0.096)  | 0.8453                | -0.048 | (-0.126,0.030)  | 0.2315                | 0.9175        |
| C30:9    | Lower Fat/Total Fat | 0.02   | (-0.092,0.131)  | 0.7289                | -0.016 | (-0.097,0.065)  | 0.7022                | 0.8095        |
| C30:10   | Lower Fat/Total Fat | 0.161  | (0.056,0.266)   | 0.0028                | 0.111  | (0.033,0.190)   | 0.0057                | 0.4433        |
| C32:11   | Lower Fat/Total Fat | 0.199  | (0.094,0.304)   | 2.1×10 <sup>-04</sup> | 0.095  | (0.016,0.174)   | 0.0184                | 0.0611        |

| Ceramide | Fat Parameter       | Black  |                 |                       | Non-Black |                |                       | P-interaction |
|----------|---------------------|--------|-----------------|-----------------------|-----------|----------------|-----------------------|---------------|
|          |                     | Beta   | 95% CI          | P-value               | Beta      | 95% CI         | P-value               |               |
| C16:0    | Lower Fat/Total Fat | -0.229 | (-0.313,-0.145) | 1.3×10 <sup>-07</sup> | -0.03     | (-0.131,0.070) | 0.5539                | 0.0275        |
| C18:0    | Lower Fat/Total Fat | -0.27  | (-0.355,-0.184) | 1.1×10 <sup>-09</sup> | -0.091    | (-0.185,0.002) | 0.0567                | 0.0866        |
| C20:0    | Lower Fat/Total Fat | -0.177 | (-0.263,-0.091) | 5.9×10 <sup>-05</sup> | -0.059    | (-0.156,0.037) | 0.2286                | 0.1854        |
| C22:1    | Lower Fat/Total Fat | -0.113 | (-0.202,-0.025) | 0.0122                | -0.027    | (-0.124,0.071) | 0.5922                | 0.1957        |
| C22:9    | Lower Fat/Total Fat | 0.07   | (-0.013,0.154)  | 0.0984                | 0.099     | (-0.002,0.199) | 0.0543                | 0.6022        |
| C22:10   | Lower Fat/Total Fat | 0.049  | (-0.030,0.127)  | 0.2251                | 0.079     | (-0.013,0.170) | 0.0913                | 0.6987        |
| C24:2    | Lower Fat/Total Fat | -0.115 | (-0.206,-0.024) | 0.0137                | -0.046    | (-0.146,0.054) | 0.3703                | 0.6117        |
| C24:10   | Lower Fat/Total Fat | 0.044  | (-0.040,0.128)  | 0.3020                | 0.106     | (0.006,0.206)  | 0.0382                | 0.2702        |
| C26:9    | Lower Fat/Total Fat | 0.171  | (0.088,0.255)   | 6.4×10 <sup>-05</sup> | 0.17      | (0.074,0.265)  | 0.0005                | 0.5956        |
| C28:9    | Lower Fat/Total Fat | 0.007  | (-0.078,0.091)  | 0.8757                | 0.008     | (-0.087,0.102) | 0.8731                | 0.9647        |
| C30:9    | Lower Fat/Total Fat | -0.002 | (-0.087,0.084)  | 0.9686                | 0.035     | (-0.063,0.134) | 0.4824                | 0.4141        |
| C30:10   | Lower Fat/Total Fat | 0.1    | (0.020,0.181)   | 0.0144                | 0.167     | (0.071,0.263)  | 7.2×10 <sup>-04</sup> | 0.1277        |
| C32:11   | Lower Fat/Total Fat | 0.103  | (0.022,0.185)   | 0.0133                | 0.16      | (0.065,0.255)  | 0.0011                | 0.3765        |

| Ceramide | Fat Parameter       | Age <50 |                 |                       | Age ≥50 |                 |                       | P-interaction |
|----------|---------------------|---------|-----------------|-----------------------|---------|-----------------|-----------------------|---------------|
|          |                     | Beta    | 95% CI          | P-value               | Beta    | 95% CI          | P-value               |               |
| C16:0    | Lower Fat/Total Fat | -0.144  | (-0.219,-0.069) | 1.8×10 <sup>-04</sup> | -0.134  | (-0.265,-0.003) | 0.0455                | 0.2998        |
| C18:0    | Lower Fat/Total Fat | -0.189  | (-0.263,-0.115) | 6.3×10 <sup>-07</sup> | -0.215  | (-0.342,-0.089) | 9.4×10 <sup>-04</sup> | 0.8452        |
| C20:0    | Lower Fat/Total Fat | -0.13   | (-0.207,-0.054) | 8.0×10 <sup>-04</sup> | -0.187  | (-0.309,-0.065) | 0.0028                | 0.9766        |
| C22:1    | Lower Fat/Total Fat | -0.074  | (-0.150,0.003)  | 0.0605                | -0.127  | (-0.257,0.003)  | 0.0553                | 0.7085        |
| C22:9    | Lower Fat/Total Fat | 0.03    | (-0.045,0.105)  | 0.4294                | 0.13    | (0.001,0.258)   | 0.0485                | 0.0421        |
| C22:10   | Lower Fat/Total Fat | -0.005  | (-0.074,0.064)  | 0.8911                | 0.11    | (-0.009,0.229)  | 0.0713                | 0.0011        |
| C24:2    | Lower Fat/Total Fat | -0.093  | (-0.172,-0.015) | 0.0201                | -0.026  | (-0.161,0.108)  | 0.7007                | 0.1740        |
| C24:10   | Lower Fat/Total Fat | 0.024   | (-0.050,0.099)  | 0.5232                | 0.106   | (-0.023,0.234)  | 0.1091                | 0.0392        |
| C26:9    | Lower Fat/Total Fat | 0.151   | (0.077,0.225)   | 6.1×10 <sup>-05</sup> | 0.147   | (0.022,0.271)   | 0.0214                | 0.4670        |
| C28:9    | Lower Fat/Total Fat | -0.024  | (-0.097,0.048)  | 0.5098                | -0.049  | (-0.171,0.074)  | 0.4341                | 0.1005        |
| C30:9    | Lower Fat/Total Fat | -0.001  | (-0.076,0.073)  | 0.9741                | -0.006  | (-0.138,0.125)  | 0.9239                | 0.1983        |
| C30:10   | Lower Fat/Total Fat | 0.096   | (0.024,0.168)   | 0.0095                | 0.166   | (0.043,0.288)   | 0.0082                | 0.0082        |
| C32:11   | Lower Fat/Total Fat | 0.098   | (0.025,0.172)   | 0.0087                | 0.174   | (0.055,0.293)   | 0.0043                | 0.0191        |

| Ceramide | Fat Parameter       | Non-Obese |                 |                       | Obese  |                 |                       | P-interaction         |
|----------|---------------------|-----------|-----------------|-----------------------|--------|-----------------|-----------------------|-----------------------|
|          |                     | Beta      | 95% CI          | P-value               | Beta   | 95% CI          | P-value               |                       |
| C16:0    | Lower Fat/Total Fat | -0.174    | (-0.250,-0.098) | 8.1×10 <sup>-06</sup> | -0.088 | (-0.208,0.031)  | 0.1469                | 0.1454                |
| C18:0    | Lower Fat/Total Fat | -0.267    | (-0.341,-0.193) | 3.2×10 <sup>-12</sup> | -0.086 | (-0.204,0.031)  | 0.1506                | 0.0239                |
| C20:0    | Lower Fat/Total Fat | -0.18     | (-0.255,-0.105) | 2.8×10 <sup>-06</sup> | -0.12  | (-0.238,-0.002) | 0.0472                | 0.8919                |
| C22:1    | Lower Fat/Total Fat | -0.121    | (-0.198,-0.043) | 0.0024                | -0.028 | (-0.145,0.090)  | 0.6463                | 0.0308                |
| C22:9    | Lower Fat/Total Fat | 0.023     | (-0.053,0.099)  | 0.5522                | 0.06   | (-0.057,0.177)  | 0.3181                | 0.2666                |
| C22:10   | Lower Fat/Total Fat | -0.044    | (-0.115,0.026)  | 0.2205                | 0.027  | (-0.085,0.138)  | 0.6358                | 0.0247                |
| C24:2    | Lower Fat/Total Fat | -0.119    | (-0.196,-0.041) | 0.0027                | 0.063  | (-0.063,0.189)  | 0.3247                | 1.3×10 <sup>-04</sup> |
| C24:10   | Lower Fat/Total Fat | 0.006     | (-0.070,0.081)  | 0.8851                | 0.071  | (-0.046,0.189)  | 0.2354                | 0.1152                |
| C26:9    | Lower Fat/Total Fat | 0.137     | (0.063,0.211)   | 3.1×10 <sup>-04</sup> | 0.174  | (0.062,0.286)   | 0.0024                | 0.0148                |
| C28:9    | Lower Fat/Total Fat | -0.086    | (-0.161,-0.010) | 0.0260                | -0.004 | (-0.112,0.104)  | 0.9440                | 0.1975                |
| C30:9    | Lower Fat/Total Fat | -0.026    | (-0.103,0.050)  | 0.5032                | -0.001 | (-0.118,0.117)  | 0.9932                | 0.6956                |
| C30:10   | Lower Fat/Total Fat | 0.053     | (-0.022,0.128)  | 0.1665                | 0.199  | (0.091,0.306)   | 3.1×10 <sup>-04</sup> | 2.2×10 <sup>-04</sup> |
| C32:11   | Lower Fat/Total Fat | 0.06      | (-0.014,0.135)  | 0.1106                | 0.204  | (0.095,0.314)   | 2.8×10 <sup>-04</sup> | 7.6×10 <sup>-05</sup> |

Beta = beta-coefficient represents the difference in s.d. units in ceramide concentration per 1-standard deviation of the body fat depot; CI= confidence limit; P<0.0003 considered statistically significant.



**ESM Table 3. Associations between Ceramides and Non-Alcoholic Fatty Liver Disease (NAFLD)**

| <b>Ceramide</b> | <b>Fat Parameter</b> | <b>Odds Ratio</b> | <b>95% CI</b> | <b>P-value</b>         |
|-----------------|----------------------|-------------------|---------------|------------------------|
| C16:0           | NAFLD                | 1.054             | 0.893,1.245   | 0.5340                 |
| C18:0           | NAFLD                | 1.152             | 0.978,1.356   | 0.0901                 |
| C20:0           | NAFLD                | 1.068             | 0.924,1.235   | 0.3726                 |
| C22:1           | NAFLD                | 0.97              | 0.823,1.143   | 0.7125                 |
| C22:9           | NAFLD                | 0.755             | 0.626,0.911   | 0.0033                 |
| C22:10          | NAFLD                | 0.764             | 0.611,0.957   | 0.0190                 |
| C24:2           | NAFLD                | 0.812             | 0.658,1.002   | 0.0517                 |
| C24:10          | NAFLD                | 0.773             | 0.64,0.933    | 0.0074                 |
| C26:9           | NAFLD                | 0.955             | 0.796,1.146   | 0.6224                 |
| C28:9           | NAFLD                | 0.898             | 0.743,1.086   | 0.2671                 |
| C30:9           | NAFLD                | 0.846             | 0.705,1.015   | 0.0712                 |
| C30:10          | NAFLD                | 0.638             | 0.526,0.774   | 5.16×10 <sup>-06</sup> |
| C32:11          | NAFLD                | 0.652             | 0.54,0.786    | 7.76×10 <sup>-06</sup> |

Odds ratio represents the odds of NAFLD per 1-SD increase in ceramide concentration.

P<0.0003 considered statistically significant. NAFLD = non-alcoholic fatty liver disease

**ESM Table 4. Associations between Body Fat Parameters and Ceramide Ratios**

| <b>Ceramide Ratio</b> | <b>Fat Parameter</b>   | <b>Beta (95% CI)</b> | <b>P-value<sup>†</sup></b> |
|-----------------------|------------------------|----------------------|----------------------------|
| C16:0/C18:0           | Visceral Fat/Total Fat | -0.02 (-0.11, 0.07)  | 0.6297                     |
| C16:0/C20:0           | Visceral Fat/Total Fat | 0.03 (-0.07, 0.12)   | 0.5697                     |
| C16:0/C22:1           | Visceral Fat/Total Fat | 0.13 (0.03, 0.22)    | 0.0086                     |
| C16:0/C22:9           | Visceral Fat/Total Fat | 0.18 (0.09, 0.27)    | 6.9×10 <sup>-05</sup>      |
| C16:0/C22:10          | Visceral Fat/Total Fat | 0.15 (0.06, 0.24)    | 8.5×10 <sup>-04</sup>      |
| C16:0/C24:2           | Visceral Fat/Total Fat | 0.12 (0.03, 0.22)    | 0.0114                     |
| C16:0/C24:10          | Visceral Fat/Total Fat | 0.1 (0.02, 0.19)     | 0.0208                     |
| C16:0/C26:9           | Visceral Fat/Total Fat | 0.31 (0.22, 0.39)    | 6.0×10 <sup>-12</sup>      |
| C16:0/C28:9           | Visceral Fat/Total Fat | 0.17 (0.08, 0.26)    | 1.8×10 <sup>-04</sup>      |
| C16:0/C30:9           | Visceral Fat/Total Fat | 0.2 (0.1, 0.29)      | 2.4×10 <sup>-05</sup>      |
| C16:0/C30:10          | Visceral Fat/Total Fat | 0.29 (0.2, 0.38)     | 8.9×10 <sup>-11</sup>      |
| C16:0/C32:11          | Visceral Fat/Total Fat | 0.3 (0.22, 0.39)     | 1.4×10 <sup>-11</sup>      |
| C18:0/C20:0           | Visceral Fat/Total Fat | 0.09 (0, 0.18)       | 0.0477                     |
| C18:0/C22:1           | Visceral Fat/Total Fat | 0.18 (0.09, 0.27)    | 1.6×10 <sup>-04</sup>      |
| C18:0/C22:9           | Visceral Fat/Total Fat | 0.12 (0.03, 0.21)    | 0.0084                     |
| C18:0/C22:10          | Visceral Fat/Total Fat | 0.13 (0.05, 0.22)    | 0.0029                     |
| C18:0/C24:2           | Visceral Fat/Total Fat | 0.19 (0.1, 0.28)     | 7.4×10 <sup>-05</sup>      |
| C18:0/C24:10          | Visceral Fat/Total Fat | 0.07 (-0.02, 0.16)   | 0.1159                     |
| C18:0/C26:9           | Visceral Fat/Total Fat | 0.23 (0.14, 0.31)    | 4.0×10 <sup>-07</sup>      |
| C18:0/C28:9           | Visceral Fat/Total Fat | 0.16 (0.07, 0.25)    | 3.5×10 <sup>-04</sup>      |
| C18:0/C30:9           | Visceral Fat/Total Fat | 0.21 (0.13, 0.3)     | 2.1×10 <sup>-06</sup>      |
| C18:0/C30:10          | Visceral Fat/Total Fat | 0.24 (0.15, 0.33)    | 6.1×10 <sup>-08</sup>      |
| C18:0/C32:11          | Visceral Fat/Total Fat | 0.25 (0.16, 0.34)    | 2.1×10 <sup>-08</sup>      |
| C20:0/C22:1           | Visceral Fat/Total Fat | 0.13 (0.04, 0.22)    | 0.0062                     |
| C20:0/C22:9           | Visceral Fat/Total Fat | 0.07 (-0.02, 0.16)   | 0.1401                     |
| C20:0/C22:10          | Visceral Fat/Total Fat | 0.1 (0.01, 0.19)     | 0.0288                     |
| C20:0/C24:2           | Visceral Fat/Total Fat | 0.12 (0.03, 0.22)    | 0.0081                     |
| C20:0/C24:10          | Visceral Fat/Total Fat | 0.03 (-0.06, 0.12)   | 0.5364                     |
| C20:0/C26:9           | Visceral Fat/Total Fat | 0.16 (0.07, 0.25)    | 4.8×10 <sup>-04</sup>      |
| C20:0/C28:9           | Visceral Fat/Total Fat | 0.1 (0.01, 0.19)     | 0.0363                     |
| C20:0/C30:9           | Visceral Fat/Total Fat | 0.16 (0.07, 0.24)    | 6.9×10 <sup>-04</sup>      |
| C20:0/C30:10          | Visceral Fat/Total Fat | 0.16 (0.07, 0.25)    | 4.2×10 <sup>-04</sup>      |
| C20:0/C32:11          | Visceral Fat/Total Fat | 0.16 (0.08, 0.25)    | 2.8×10 <sup>-04</sup>      |
| C22:1/C22:9           | Visceral Fat/Total Fat | 0.01 (-0.08, 0.1)    | 0.8103                     |
| C22:1/C22:10          | Visceral Fat/Total Fat | 0.03 (-0.06, 0.13)   | 0.4559                     |
| C22:1/C24:2           | Visceral Fat/Total Fat | 0.03 (-0.07, 0.12)   | 0.5773                     |
| C22:1/C24:10          | Visceral Fat/Total Fat | -0.03 (-0.12, 0.06)  | 0.5111                     |
| C22:1/C26:9           | Visceral Fat/Total Fat | 0.1 (0.01, 0.19)     | 0.0350                     |
| C22:1/C28:9           | Visceral Fat/Total Fat | -0.01 (-0.1, 0.08)   | 0.8469                     |
| C22:1/C30:9           | Visceral Fat/Total Fat | 0.04 (-0.05, 0.14)   | 0.3477                     |
| C22:1/C30:10          | Visceral Fat/Total Fat | 0.09 (0.01, 0.18)    | 0.0387                     |
| C22:1/C32:11          | Visceral Fat/Total Fat | 0.09 (0, 0.18)       | 0.0453                     |
| C22:9/C22:10          | Visceral Fat/Total Fat | 0.04 (-0.04, 0.12)   | 0.3507                     |

|               |                        |                      |                       |
|---------------|------------------------|----------------------|-----------------------|
| C22:9/C24:2   | Visceral Fat/Total Fat | 0 (-0.09, 0.1)       | 0.9716                |
| C22:9/C24:10  | Visceral Fat/Total Fat | -0.12 (-0.21, -0.03) | 0.0063                |
| C22:9/C26:9   | Visceral Fat/Total Fat | 0.17 (0.08, 0.26)    | 1.1×10 <sup>-04</sup> |
| C22:9/C28:9   | Visceral Fat/Total Fat | 0.01 (-0.07, 0.1)    | 0.7519                |
| C22:9/C30:9   | Visceral Fat/Total Fat | 0.05 (-0.04, 0.14)   | 0.2531                |
| C22:9/C30:10  | Visceral Fat/Total Fat | 0.13 (0.04, 0.22)    | 0.0038                |
| C22:9/C32:11  | Visceral Fat/Total Fat | 0.12 (0.03, 0.21)    | 0.0069                |
| C22:10/C24:2  | Visceral Fat/Total Fat | -0.02 (-0.11, 0.07)  | 0.6524                |
| C22:10/C24:10 | Visceral Fat/Total Fat | -0.1 (-0.19, -0.02)  | 0.0172                |
| C22:10/C26:9  | Visceral Fat/Total Fat | 0.06 (-0.03, 0.14)   | 0.1703                |
| C22:10/C28:9  | Visceral Fat/Total Fat | -0.02 (-0.1, 0.07)   | 0.6912                |
| C22:10/C30:9  | Visceral Fat/Total Fat | 0.01 (-0.08, 0.1)    | 0.8536                |
| C22:10/C30:10 | Visceral Fat/Total Fat | 0.06 (-0.02, 0.15)   | 0.1631                |
| C22:10/C32:11 | Visceral Fat/Total Fat | 0.06 (-0.03, 0.14)   | 0.2050                |
| C24:2/C24:10  | Visceral Fat/Total Fat | -0.04 (-0.13, 0.05)  | 0.4159                |
| C24:2/C26:9   | Visceral Fat/Total Fat | 0.08 (-0.01, 0.17)   | 0.0905                |
| C24:2/C28:9   | Visceral Fat/Total Fat | -0.02 (-0.11, 0.07)  | 0.6524                |
| C24:2/C30:9   | Visceral Fat/Total Fat | 0.03 (-0.07, 0.12)   | 0.5626                |
| C24:2/C30:10  | Visceral Fat/Total Fat | 0.07 (-0.02, 0.17)   | 0.1208                |
| C24:2/C32:11  | Visceral Fat/Total Fat | 0.07 (-0.02, 0.16)   | 0.1289                |
| C24:10/C26:9  | Visceral Fat/Total Fat | 0.21 (0.12, 0.3)     | 2.1×10 <sup>-06</sup> |
| C24:10/C28:9  | Visceral Fat/Total Fat | 0.06 (-0.02, 0.15)   | 0.1482                |
| C24:10/C30:9  | Visceral Fat/Total Fat | 0.08 (0, 0.17)       | 0.0635                |
| C24:10/C30:10 | Visceral Fat/Total Fat | 0.16 (0.07, 0.25)    | 3.8×10 <sup>-04</sup> |
| C24:10/C32:11 | Visceral Fat/Total Fat | 0.17 (0.08, 0.25)    | 2.1×10 <sup>-04</sup> |
| C26:9/C28:9   | Visceral Fat/Total Fat | -0.12 (-0.21, -0.04) | 0.0056                |
| C26:9/C30:9   | Visceral Fat/Total Fat | -0.04 (-0.13, 0.05)  | 0.3501                |
| C26:9/C30:10  | Visceral Fat/Total Fat | -0.01 (-0.1, 0.08)   | 0.8160                |
| C26:9/C32:11  | Visceral Fat/Total Fat | -0.01 (-0.1, 0.08)   | 0.8223                |
| C28:9/C30:9   | Visceral Fat/Total Fat | 0.07 (-0.02, 0.16)   | 0.1119                |
| C28:9/C30:10  | Visceral Fat/Total Fat | 0.17 (0.09, 0.25)    | 4.3×10 <sup>-05</sup> |
| C28:9/C32:11  | Visceral Fat/Total Fat | 0.14 (0.06, 0.22)    | 9.0×10 <sup>-04</sup> |
| C30:9/C30:10  | Visceral Fat/Total Fat | 0.05 (-0.03, 0.14)   | 0.2238                |
| C30:9/C32:11  | Visceral Fat/Total Fat | 0.05 (-0.04, 0.14)   | 0.2480                |
| C30:10/C32:11 | Visceral Fat/Total Fat | 0 (-0.09, 0.09)      | 0.9483                |

| Ceramide Ratio | Fat Parameter       | Beta (95% CI)        | P-value**             |
|----------------|---------------------|----------------------|-----------------------|
| C16:0/C18:0    | Lower Fat/Total Fat | 0.13 (0.06, 0.2)     | 1.7×10 <sup>-04</sup> |
| C16:0/C20:0    | Lower Fat/Total Fat | 0.08 (0.01, 0.14)    | 0.0297                |
| C16:0/C22:1    | Lower Fat/Total Fat | -0.02 (-0.09, 0.05)  | 0.6213                |
| C16:0/C22:9    | Lower Fat/Total Fat | -0.2 (-0.26, -0.13)  | 6.2×10 <sup>-09</sup> |
| C16:0/C22:10   | Lower Fat/Total Fat | -0.1 (-0.16, -0.03)  | 0.0039                |
| C16:0/C24:2    | Lower Fat/Total Fat | -0.01 (-0.08, 0.06)  | 0.8283                |
| C16:0/C24:10   | Lower Fat/Total Fat | -0.16 (-0.23, -0.1)  | 1.0×10 <sup>-06</sup> |
| C16:0/C26:9    | Lower Fat/Total Fat | -0.26 (-0.32, -0.19) | 6.4×10 <sup>-15</sup> |

|               |                     |                      |                       |
|---------------|---------------------|----------------------|-----------------------|
| C16:0/C28:9   | Lower Fat/Total Fat | -0.09 (-0.15, -0.02) | 0.0096                |
| C16:0/C30:9   | Lower Fat/Total Fat | -0.09 (-0.15, -0.02) | 0.0119                |
| C16:0/C30:10  | Lower Fat/Total Fat | -0.21 (-0.27, -0.14) | $6.9 \times 10^{-10}$ |
| C16:0/C32:11  | Lower Fat/Total Fat | -0.2 (-0.27, -0.14)  | $1.1 \times 10^{-09}$ |
| C18:0/C20:0   | Lower Fat/Total Fat | -0.04 (-0.11, 0.02)  | 0.1782                |
| C18:0/C22:1   | Lower Fat/Total Fat | -0.16 (-0.23, -0.09) | $3.5 \times 10^{-06}$ |
| C18:0/C22:9   | Lower Fat/Total Fat | -0.21 (-0.28, -0.15) | $3.1 \times 10^{-10}$ |
| C18:0/C22:10  | Lower Fat/Total Fat | -0.16 (-0.22, -0.09) | $3.1 \times 10^{-06}$ |
| C18:0/C24:2   | Lower Fat/Total Fat | -0.16 (-0.22, -0.09) | $1.1 \times 10^{-05}$ |
| C18:0/C24:10  | Lower Fat/Total Fat | -0.19 (-0.25, -0.12) | $1.7 \times 10^{-08}$ |
| C18:0/C26:9   | Lower Fat/Total Fat | -0.27 (-0.34, -0.21) | $9.0 \times 10^{-17}$ |
| C18:0/C28:9   | Lower Fat/Total Fat | -0.18 (-0.25, -0.12) | $4.0 \times 10^{-08}$ |
| C18:0/C30:9   | Lower Fat/Total Fat | -0.2 (-0.27, -0.14)  | $1.6 \times 10^{-09}$ |
| C18:0/C30:10  | Lower Fat/Total Fat | -0.27 (-0.34, -0.21) | $3.4 \times 10^{-16}$ |
| C18:0/C32:11  | Lower Fat/Total Fat | -0.27 (-0.33, -0.2)  | $5.7 \times 10^{-16}$ |
| C20:0/C22:1   | Lower Fat/Total Fat | -0.13 (-0.2, -0.07)  | $1.2 \times 10^{-04}$ |
| C20:0/C22:9   | Lower Fat/Total Fat | -0.17 (-0.23, -0.1)  | $1.1 \times 10^{-06}$ |
| C20:0/C22:10  | Lower Fat/Total Fat | -0.14 (-0.2, -0.07)  | $6.8 \times 10^{-05}$ |
| C20:0/C24:2   | Lower Fat/Total Fat | -0.11 (-0.18, -0.04) | 0.0016                |
| C20:0/C24:10  | Lower Fat/Total Fat | -0.15 (-0.21, -0.08) | $1.2 \times 10^{-05}$ |
| C20:0/C26:9   | Lower Fat/Total Fat | -0.22 (-0.28, -0.15) | $5.2 \times 10^{-11}$ |
| C20:0/C28:9   | Lower Fat/Total Fat | -0.16 (-0.22, -0.09) | $4.6 \times 10^{-06}$ |
| C20:0/C30:9   | Lower Fat/Total Fat | -0.18 (-0.25, -0.12) | $6.9 \times 10^{-08}$ |
| C20:0/C30:10  | Lower Fat/Total Fat | -0.21 (-0.27, -0.14) | $2.8 \times 10^{-10}$ |
| C20:0/C32:11  | Lower Fat/Total Fat | -0.2 (-0.27, -0.14)  | $5.9 \times 10^{-10}$ |
| C22:1/C22:9   | Lower Fat/Total Fat | -0.11 (-0.17, -0.04) | 0.0019                |
| C22:1/C22:10  | Lower Fat/Total Fat | -0.06 (-0.13, 0)     | 0.0681                |
| C22:1/C24:2   | Lower Fat/Total Fat | 0 (-0.07, 0.06)      | 0.9104                |
| C22:1/C24:10  | Lower Fat/Total Fat | -0.09 (-0.15, -0.02) | 0.0126                |
| C22:1/C26:9   | Lower Fat/Total Fat | -0.16 (-0.23, -0.1)  | $1.5 \times 10^{-06}$ |
| C22:1/C28:9   | Lower Fat/Total Fat | -0.06 (-0.13, 0.01)  | 0.0703                |
| C22:1/C30:9   | Lower Fat/Total Fat | -0.07 (-0.14, 0)     | 0.0357                |
| C22:1/C30:10  | Lower Fat/Total Fat | -0.16 (-0.23, -0.1)  | $9.7 \times 10^{-07}$ |
| C22:1/C32:11  | Lower Fat/Total Fat | -0.15 (-0.22, -0.09) | $5.4 \times 10^{-06}$ |
| C22:9/C22:10  | Lower Fat/Total Fat | 0.02 (-0.04, 0.09)   | 0.4308                |
| C22:9/C24:2   | Lower Fat/Total Fat | 0.11 (0.04, 0.18)    | 0.0021                |
| C22:9/C24:10  | Lower Fat/Total Fat | 0.03 (-0.03, 0.1)    | 0.3003                |
| C22:9/C26:9   | Lower Fat/Total Fat | -0.1 (-0.17, -0.04)  | 0.0018                |
| C22:9/C28:9   | Lower Fat/Total Fat | 0.07 (0.01, 0.14)    | 0.0293                |
| C22:9/C30:9   | Lower Fat/Total Fat | 0.05 (-0.02, 0.11)   | 0.1579                |
| C22:9/C30:10  | Lower Fat/Total Fat | -0.03 (-0.09, 0.04)  | 0.3850                |
| C22:9/C32:11  | Lower Fat/Total Fat | -0.01 (-0.08, 0.05)  | 0.7299                |
| C22:10/C24:2  | Lower Fat/Total Fat | 0.08 (0.01, 0.14)    | 0.0298                |
| C22:10/C24:10 | Lower Fat/Total Fat | 0 (-0.06, 0.07)      | 0.8816                |
| C22:10/C26:9  | Lower Fat/Total Fat | -0.07 (-0.14, -0.01) | 0.0205                |
| C22:10/C28:9  | Lower Fat/Total Fat | 0.02 (-0.04, 0.09)   | 0.4584                |

|               |                     |                      |                       |
|---------------|---------------------|----------------------|-----------------------|
| C22:10/C30:9  | Lower Fat/Total Fat | 0.02 (-0.05, 0.08)   | 0.6160                |
| C22:10/C30:10 | Lower Fat/Total Fat | -0.05 (-0.12, 0.01)  | 0.1009                |
| C22:10/C32:11 | Lower Fat/Total Fat | -0.04 (-0.1, 0.02)   | 0.2239                |
| C24:2/C24:10  | Lower Fat/Total Fat | -0.09 (-0.15, -0.02) | 0.0135                |
| C24:2/C26:9   | Lower Fat/Total Fat | -0.15 (-0.22, -0.09) | $8.8 \times 10^{-06}$ |
| C24:2/C28:9   | Lower Fat/Total Fat | -0.06 (-0.13, 0.01)  | 0.0907                |
| C24:2/C30:9   | Lower Fat/Total Fat | -0.07 (-0.14, 0)     | 0.0560                |
| C24:2/C30:10  | Lower Fat/Total Fat | -0.15 (-0.22, -0.08) | $1.5 \times 10^{-05}$ |
| C24:2/C32:11  | Lower Fat/Total Fat | -0.14 (-0.21, -0.08) | $3.0 \times 10^{-05}$ |
| C24:10/C26:9  | Lower Fat/Total Fat | -0.1 (-0.16, -0.03)  | 0.0033                |
| C24:10/C28:9  | Lower Fat/Total Fat | 0.04 (-0.02, 0.11)   | 0.2183                |
| C24:10/C30:9  | Lower Fat/Total Fat | 0.03 (-0.03, 0.1)    | 0.3615                |
| C24:10/C30:10 | Lower Fat/Total Fat | -0.05 (-0.11, 0.02)  | 0.1377                |
| C24:10/C32:11 | Lower Fat/Total Fat | -0.03 (-0.1, 0.03)   | 0.3309                |
| C26:9/C28:9   | Lower Fat/Total Fat | 0.16 (0.1, 0.23)     | $4.8 \times 10^{-07}$ |
| C26:9/C30:9   | Lower Fat/Total Fat | 0.11 (0.04, 0.17)    | 0.0014                |
| C26:9/C30:10  | Lower Fat/Total Fat | 0.06 (0, 0.13)       | 0.0686                |
| C26:9/C32:11  | Lower Fat/Total Fat | 0.07 (0.01, 0.14)    | 0.0309                |
| C28:9/C30:9   | Lower Fat/Total Fat | -0.01 (-0.07, 0.06)  | 0.7932                |
| C28:9/C30:10  | Lower Fat/Total Fat | -0.18 (-0.24, -0.12) | $1.8 \times 10^{-09}$ |
| C28:9/C32:11  | Lower Fat/Total Fat | -0.14 (-0.2, -0.08)  | $8.0 \times 10^{-06}$ |
| C30:9/C30:10  | Lower Fat/Total Fat | -0.11 (-0.18, -0.05) | $5.9 \times 10^{-04}$ |
| C30:9/C32:11  | Lower Fat/Total Fat | -0.09 (-0.16, -0.03) | 0.0043                |
| C30:10/C32:11 | Lower Fat/Total Fat | 0.01 (-0.05, 0.08)   | 0.6867                |

Beta = beta-coefficient represents the difference in s.d. units in ceramide concentration per 1-standard deviation of the body fat depot; CI= confidence limit  
P<0.0003 considered statistically significant.

**ESM Table 5. Associations of Ceramides with Incident HOMA-IR (>3) at Follow-Up**

| <b>Outcome</b> | <b>Ceramide</b> | <b>N</b> | <b>N case</b> | <b>OR</b> | <b>95% CI</b> | <b>P-value</b> |
|----------------|-----------------|----------|---------------|-----------|---------------|----------------|
| HOMA-IR > 3    | C16:0           | 806      | 207           | 1.132     | (0.935-1.371) | 0.2039         |
| HOMA-IR > 3    | C18:0           | 829      | 216           | 1.120     | (0.944-1.329) | 0.1928         |
| HOMA-IR > 3    | C20:0           | 806      | 211           | 0.989     | (0.853-1.147) | 0.8812         |
| HOMA-IR > 3    | C22:1           | 821      | 220           | 1.113     | (0.957-1.293) | 0.1642         |
| HOMA-IR > 3    | C22:9           | 855      | 225           | 0.930     | (0.796-1.088) | 0.3643         |
| HOMA-IR > 3    | C22:10          | 855      | 225           | 0.913     | (0.766-1.089) | 0.3125         |
| HOMA-IR > 3    | C24:2           | 787      | 209           | 1.053     | (0.901-1.232) | 0.5162         |
| HOMA-IR > 3    | C24:10          | 855      | 225           | 0.946     | (0.813-1.101) | 0.4737         |
| HOMA-IR > 3    | C26:9           | 855      | 225           | 0.870     | (0.701-1.081) | 0.2088         |
| HOMA-IR > 3    | C28:9           | 855      | 225           | 1.097     | (0.925-1.301) | 0.2864         |
| HOMA-IR > 3    | C30:9           | 855      | 225           | 1.035     | (0.887-1.207) | 0.6655         |
| HOMA-IR > 3    | C30:10          | 855      | 225           | 1.042     | (0.883-1.230) | 0.6252         |
| HOMA-IR > 3    | C32:11          | 855      | 225           | 0.976     | (0.824-1.156) | 0.7783         |

P-values were calculated using logistic regression model adjusted for age, sex, ethnicity, VAT, BMI, and baseline HOMA-IR. OR = odds ratio for incident HOMA-IR>3 per 1-standard deviation of ceramide concentration. P<0.0003 considered statistically significant

ESM Fig. 1. Adjusted Correlations between Ceramide Species in the Dallas Heart Study

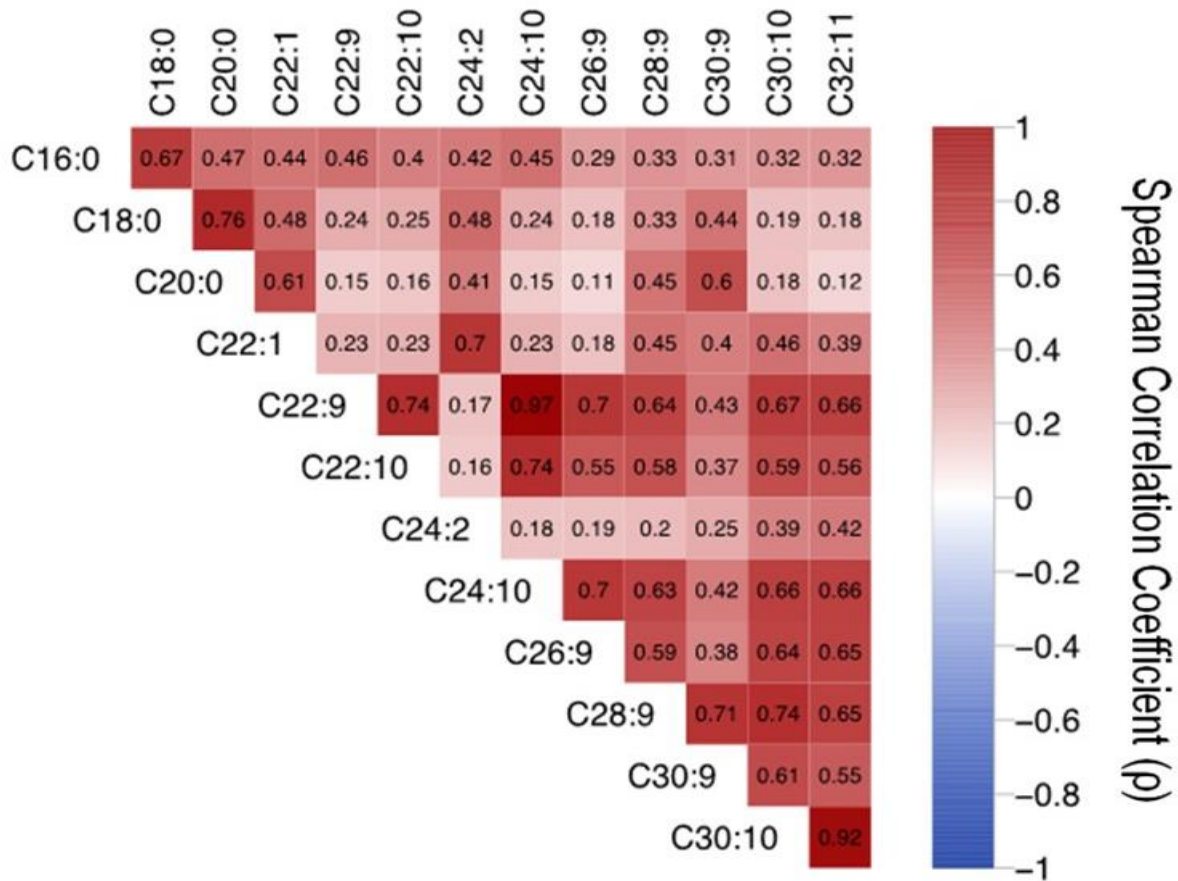

Adjusted for age, sex, ethnicity, and plate

**ESM Fig. 2. Adjusted Correlations between Ceramide and Non-Esterified Free Fatty Acid Species in the Dallas Heart Study**

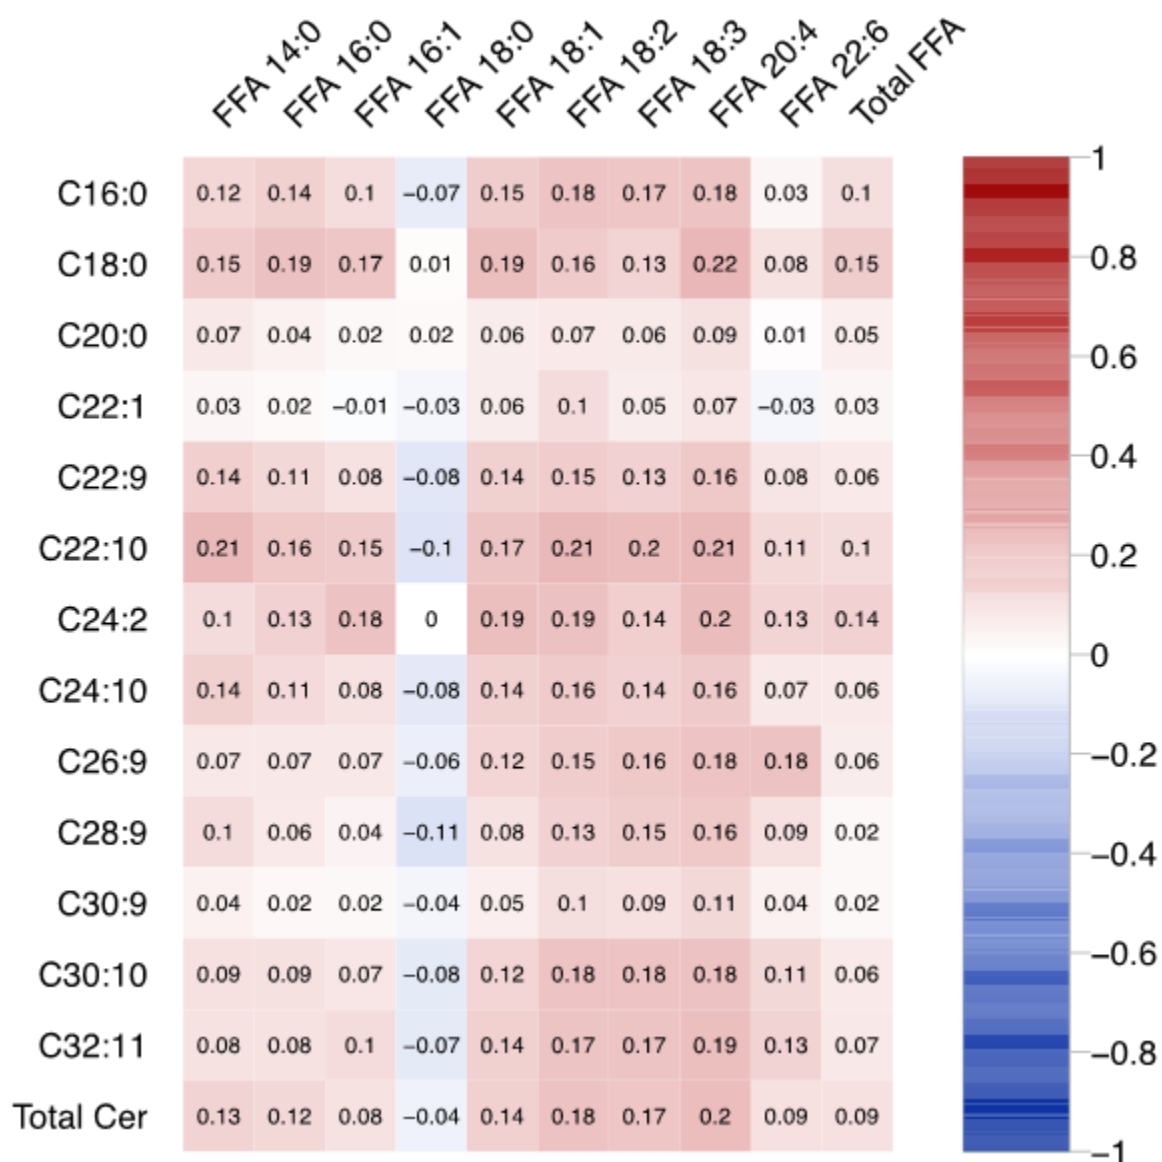

Adjusted for age, sex, ethnicity, and plate  
FFA=free fatty acid
